# Supplementary figures and images for: Imaging and energetics of single SSB-ssDNA molecules reveal intramolecular condensation and insight into RecOR function
Source: eLife journal article supplement (doi:10.7554/elife.08646), 2015-09-18

Figure 3 - Supplement 6

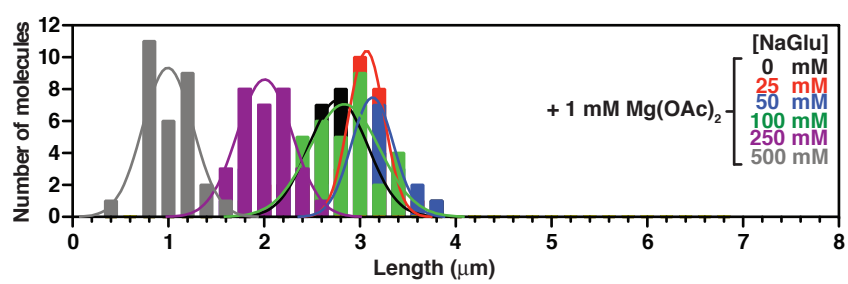

Supplement: supp [file elife-08646-supp-v1.zip]

Figure 5 - Supplement 2

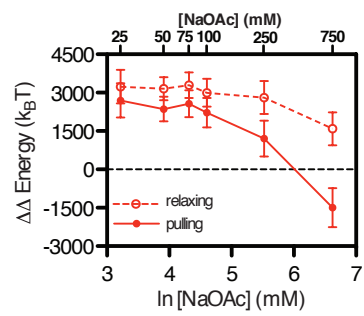

Supplement: supp [file elife-08646-supp-v1.zip]

Figure 5 - Supplement 1

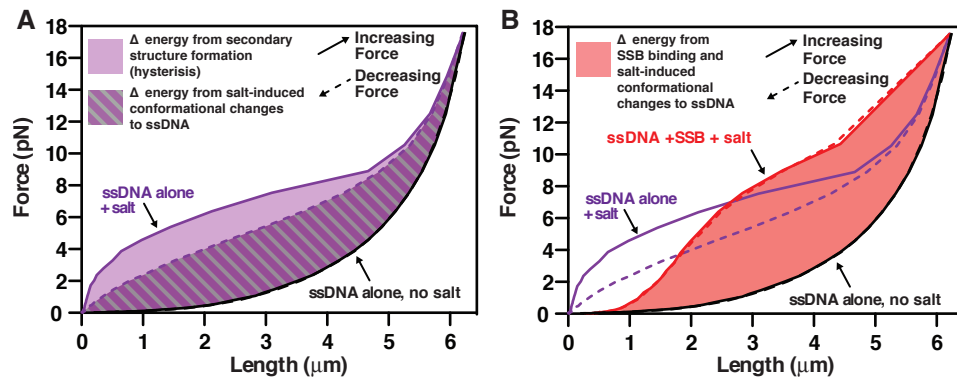

Supplement: supp [file elife-08646-supp-v1.zip]

Figure 3 - Supplement 2

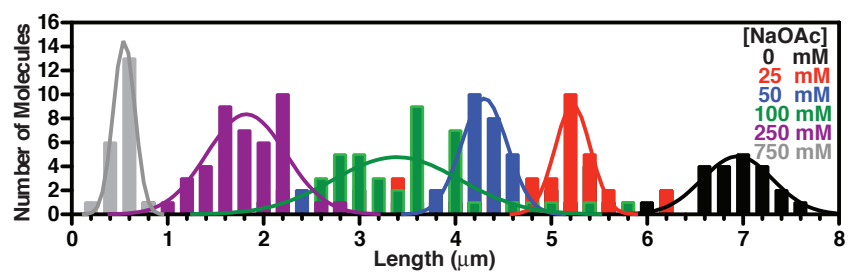

Supplement: supp [file elife-08646-supp-v1.zip]

Figure 3 - Supplement 1

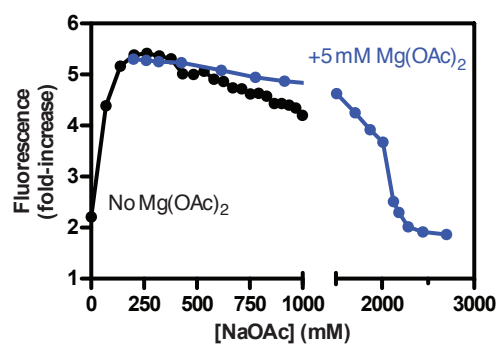

Supplement: supp [file elife-08646-supp-v1.zip]

Figure 1 - Supplement 1

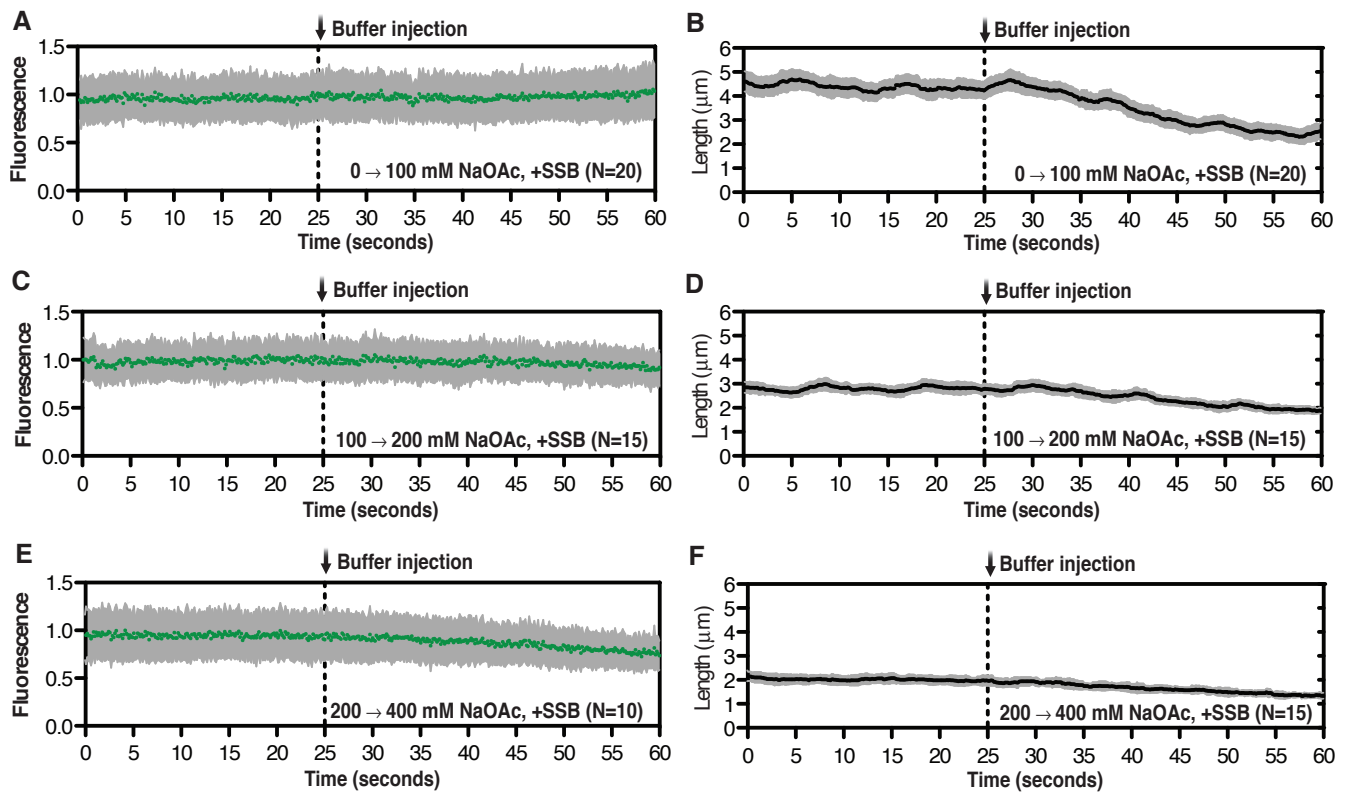

Supplement: supp [file elife-08646-supp-v1.zip]

Figure 3 - Supplement 5

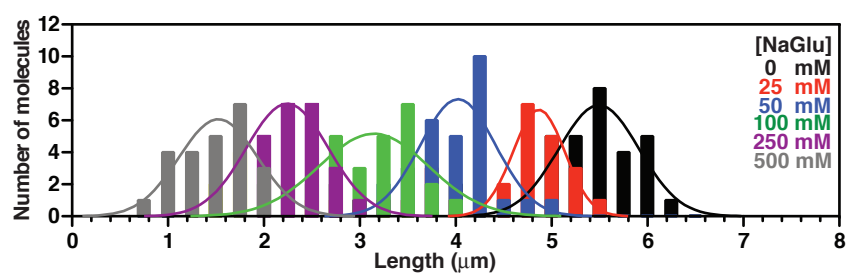

Supplement: supp [file elife-08646-supp-v1.zip]

Figure 4–Supplement 1

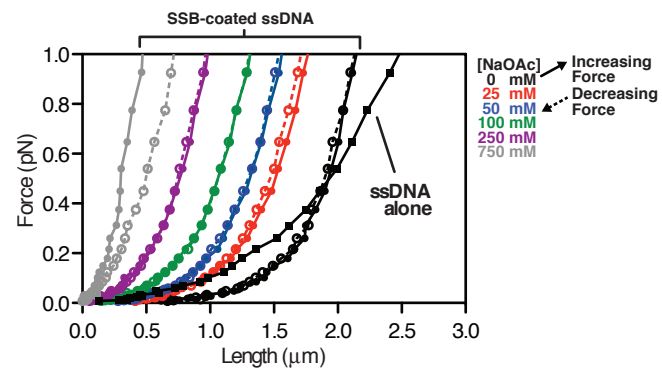

Supplement: supp [file elife-08646-supp-v1.zip]

Figure 2 – Supplement 1

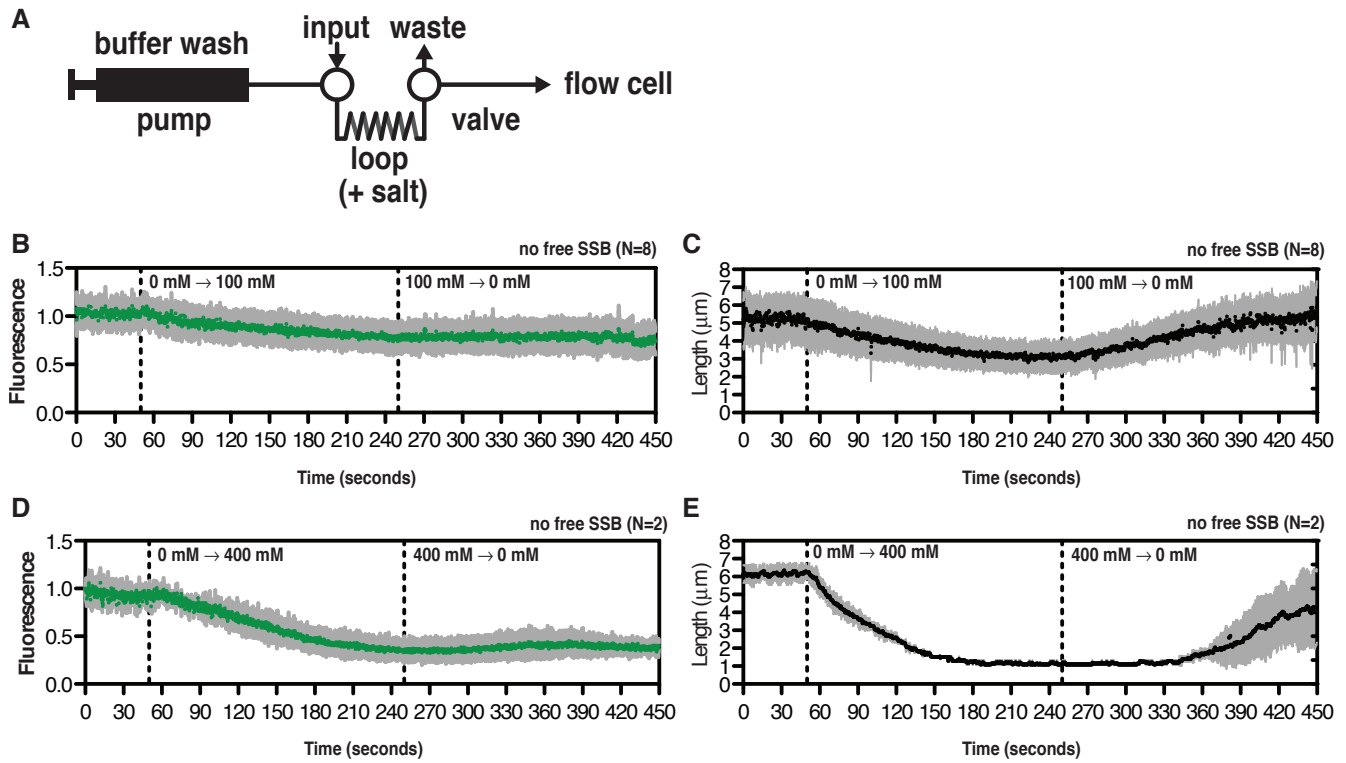

Supplement: supp [file elife-08646-supp-v1.zip]

**Figure 3 - Supplement 3**

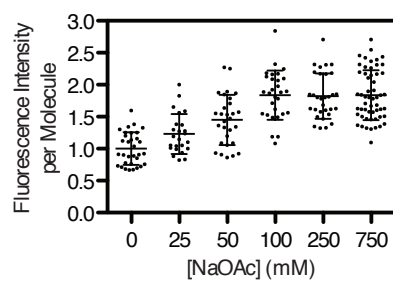

Supplement: supp [file elife-08646-supp-v1.zip]

Figure 3 - Supplement 4

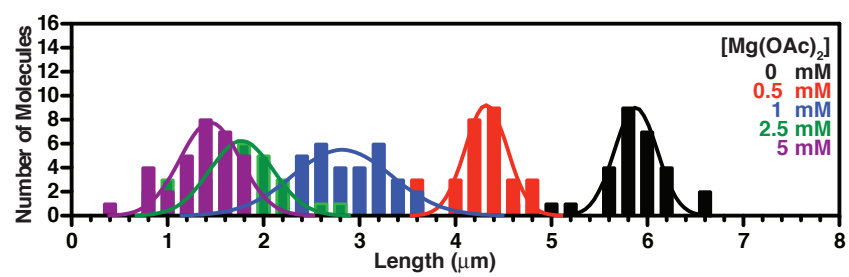

Supplement: supp [file elife-08646-supp-v1.zip]
